# Supplementary material
Source: publisher site journal article supplement (https://www.kjim.org/upload/media/kjim-2019-020-suppl2.pdf)
Supplement: Supplementary file 1 [file kjim-2019-020-suppl2.pdf]

**Supplementary Table 2. Multiple sensitivity analysis for statin use, subsequent herpes zoster, and the mediating effect of cardiovascular disease by statin use through herpes zoster<sup>a</sup>**

| Variable                                                                                                                         | MI     |             |         | Stroke |             |         | Cardiovascular disease |             |          |
|----------------------------------------------------------------------------------------------------------------------------------|--------|-------------|---------|--------|-------------|---------|------------------------|-------------|----------|
|                                                                                                                                  | aHR    | 95% CI      | p value | aHR    | 95% CI      | p value | aHR                    | 95% CI      | p value  |
| Chronic pulmonary disease included in multivariate analysis                                                                      |        |             |         |        |             |         |                        |             |          |
| NDE                                                                                                                              | 0.900  | 0.772–1.048 | 0.1760  | 0.873  | 0.791–0.964 | 0.0071  | 0.884                  | 0.812–0.964 | 0.0050   |
| ME/NIE                                                                                                                           | 1.015  | 1.003–1.027 | 0.0118  | 1.010  | 1.003–1.018 | 0.0039  | 1.013                  | 1.006–1.019 | < 0.0001 |
| Total effect                                                                                                                     | 0.9134 | 0.784–1.064 | 0.2454  | 0.883  | 0.800–0.974 | 0.0130  | 0.896                  | 0.822–0.976 | 0.0118   |
| Proportion mediated, %                                                                                                           |        | –15.72      |         |        | –7.78       |         |                        | –10.79      |          |
| People between 18 and 40 years included                                                                                          |        |             |         |        |             |         |                        |             |          |
| NDE                                                                                                                              | 0.905  | 0.779–1.051 | 0.1897  | 0.869  | 0.788–0.958 | 0.0049  | 0.883                  | 0.811–0.961 | 0.0039   |
| ME/NIE                                                                                                                           | 1.013  | 1.004–1.023 | 0.0050  | 1.010  | 1.004–1.016 | 0.0007  | 1.012                  | 1.006–1.017 | < 0.0001 |
| Total effect                                                                                                                     | 0.917  | 0.789–1.065 | 0.2547  | 0.877  | 0.796–0.968 | 0.0084  | 0.893                  | 0.820–0.972 | 0.0087   |
| Proportion mediated, %                                                                                                           |        | –14.50      |         |        | –6.98       |         |                        | –9.52       |          |
| People between 18 and 40 years old who used statin for less than 6 months prior to study initiation included as non-statin group |        |             |         |        |             |         |                        |             |          |
| NDE                                                                                                                              | 0.890  | 0.769–1.031 | 0.1197  | 0.885  | 0.804–0.975 | 0.0129  | 0.891                  | 0.820–0.968 | 0.0065   |
| ME/NIE                                                                                                                           | 1.012  | 1.003–1.021 | 0.0072  | 1.009  | 1.003–1.014 | 0.0016  | 1.010                  | 1.006–1.015 | < 0.0001 |
| Total effect                                                                                                                     | 0.901  | 0.778–1.043 | 0.1617  | 0.893  | 0.811–0.983 | 0.0206  | 0.900                  | 0.828–0.978 | 0.0130   |
| Proportion mediated, %                                                                                                           |        | –10.67      |         |        | –7.05       |         |                        | –9.14       |          |

MI, myocardial infarction; aHR, adjusted hazard ratios; CI, confidence interval; NDE, natural direct effect; ME, mediation effect; NIE, natural indirect effect.

<sup>a</sup>Adjusted for age, male gender, hypertension, hyperlipidemia, ischemic heart disease, diabetes, heart failure, peripheral vascular disease, arterial fibrillation or atrial flutter, renal disease, and valvular heart disease.
